## Semantic Fluency Predicts Six-Year Progression to Mild Cognitive Impairment in Middle-Aged Men

Daniel E. Gustavson<sup>a</sup>, Jeremy A. Elman<sup>a</sup>, Matthew S. Panizzon<sup>a</sup>, Carol E. Franz<sup>a</sup>, Jordan Zuber<sup>a</sup>, Mark Sanderson-Cimino<sup>a</sup>, Chandra A. Reynolds<sup>b</sup>, Kristen C. Jacobson<sup>c</sup>, Hong Xian<sup>d</sup>, Amy J. Jak<sup>a</sup>, Rosemary Toomey<sup>e</sup>, Michael J. Lyons<sup>e</sup>, William S. Kremen<sup>a,f</sup>

<sup>a</sup> Department of Psychiatry, Center for Behavior Genetics of Aging, University of California, San Diego, La Jolla, CA

<sup>b</sup> Department of Psychology, University of California, Riverside, Riverside, CA

<sup>c</sup> Department of Psychiatry and Behavioral Neuroscience, University of Chicago, Chicago, IL

<sup>d</sup> Department of Epidemiology and Biostatistics, St. Louis University and Clinical Epidemiology Center, Veterans Affairs St. Louis Healthcare System, St. Louis, MO

<sup>e</sup> Department of Psychological and Brain Sciences, Boston University, Boston, MA

<sup>f</sup> Center of Excellence for Stress and Mental Health, Veterans Affairs San Diego Healthcare System, La Jolla, CA

Correspondence concerning this article should be addressed to Daniel Gustavson, Department of Psychiatry, Center for Behavior Genetics of Aging, University of California, San Diego, La Jolla, CA. Address: 9500 Gilman Dr. (MC 0738), La Jolla, CA 92093. Phone: 303-748-0627. Fax: 858-822-5856. E-mail: [dgustavson@ucsd.edu](mailto:dgustavson@ucsd.edu)

### Funding:

This research was supported by Grants AG050595, AG018386, AG018384, AG022381, and AG047903 from the National Institutes of Health. The content of this manuscript is the responsibility of the authors and does not represent official views of NIA/NIH, or the Veterans' Administration. Numerous organizations provided invaluable assistance in the conduct of the VET Registry, including: U.S. Department of Veterans Affairs, Department of Defense; National Personnel Records Center, National Archives and Records Administration; Internal Revenue Service; National Opinion Research Center; National Research Council, National Academy of Sciences; the Institute for Survey Research, Temple University. The authors gratefully acknowledge the continued cooperation of the twins and the efforts of many staff members.

## SEMANTIC FLUENCY PREDICTS MCI 2

### Abstract

**Objective:** Test the hypothesis that individual differences in episodic memory and verbal fluency in cognitively normal middle-aged adults will predict progression to amnesic MCI after 6 years.

**Method:** 1484 male twins, 842 of whom were cognitively normal at wave 1 completed measures of episodic memory and verbal fluency at up to 2 time-points (mean age 56 and 62 years).

**Results:** In the subgroup of 842, poor episodic memory predicted progression to both amnesic MCI (OR=4.42, 95% CI [2.44, 10.60]) and non-amnesic MCI (OR=1.92, 95% CI [1.32, 3.44]). Poor semantic verbal fluency also independently predicted progression to amnesic MCI (OR=1.86, 95% CI [1.12, 3.52]). In the full sample, a semantic-specific fluency latent variable at wave 1 (which controls for phonemic fluency) predicted change in episodic memory at wave 2 ( $\beta=.13$ ), but not vice-versa ( $\beta=.04$ ). Associations between episodic memory and verbal fluency factors were primarily explained by genetic, rather than environmental, correlations.

**Conclusions:** These findings emphasize the utility of memory and fluency measures in early identification of AD risk. Among individuals who were cognitively normal at wave 1, episodic memory moderately-to-strongly predicted progression to MCI at average age 62, emphasizing the fact that there is still meaningful variability even among cognitively normal individuals. Episodic memory, which is typically a primary focus for AD risk, declined earlier and more quickly than fluency. However, semantic fluency at average age 56 predicted of 6-year change in memory as well as progression to amnesic MCI even after accounting for baseline memory performance.

## Introduction

The A/T(N) framework emphasizes biomarkers in an effort to move toward a biological rather than a clinical diagnosis of Alzheimer's disease<sup>1</sup>. Although the framework is agnostic regarding the sequence of biomarker progression, it is generally assumed that biomarker positivity is present before cognitive manifestations. Amyloid beta and tau biomarkers indicate increased risk because they reflect underlying disease pathophysiology, but it does not necessarily follow that—with currently available detection techniques—these biomarkers will be the earliest predictors of progression to AD. In non-demented older adults, including those who already have mild cognitive impairment (MCI), cognitive markers—particularly episodic memory—do as well or better than AD biomarkers<sup>2-5</sup>. Semantic fluency impairment has also been associated with MCI and progression to AD in older adults<sup>6-13</sup>. However, because the AD process begins decades before dementia onset, there is a pressing need for earlier identification of risk<sup>14,15</sup>.

With that in mind, there is still substantial variability in cognitive function even in cognitively normal, middle-aged adults. To address the need for early identification, we examined the ability of cognitive measures to predict progression to MCI in a 6-year follow-up of cognitively normal, community-dwelling men in their 50s who were rigorously defined as cognitively normal at baseline: 1) Does episodic memory predict progression to MCI? 2) Does semantic fluency predict progression to MCI after accounting for episodic memory? 3) Does episodic memory predict change in semantic fluency or vice versa? 4) To what extent do shared genetic influences underlie associations between semantic fluency and episodic memory?

## Method

### Subjects

## SEMANTIC FLUENCY PREDICTS MCI 4

Analyses were based on 1484 individual male twins who participated in at least one wave of the longitudinal VETSA project. All participants were recruited randomly from the Vietnam Era Twin Registry from a previous study<sup>16</sup>. All served in the United States military at some time between 1965 and 1975; nearly 80% did not serve in combat or in Vietnam<sup>17,18</sup>. Participants are generally representative of American men in their age group with respect to health and lifestyle characteristics<sup>19</sup>. See Table 1 for demographic characteristics of the sample, which includes the descriptive statistics for all covariates in the primary analyses involving MCI.

At wave 1 (N=1285), participants included 359 full monozygotic (MZ) twin pairs, 271 full dizygotic (DZ) twin pairs, and 25 unpaired twins. At wave 2 (N=1193), participants included 328 full MZ twin pairs, 231 full DZ twin pairs, and 74 unpaired twins. Most individuals participated at both sessions (N=1014). For analyses involving prediction of progression to MCI, we examined 842 individuals who were cognitively normal at wave 1, returned at wave 2, and had data for all relevant covariates. All participants completed informed consent, and all procedures were approved the Institutional Review Board of participating institutions.

### Measures

Development of latent variable measures of episodic memory, verbal fluency, and other cognitive variables, and MCI diagnoses has been reported in our earlier work<sup>20-23</sup>. These measures are summarized briefly here.

All cognitive measures at the second wave of testing were adjusted to account for the fact that many of the subjects had encountered the tasks before<sup>22</sup>. Practice effects were computed according to the method of Rönnlund et al.<sup>24,25</sup> and utilized data from individuals who completed both waves of assessment (N = 1014), individuals who did not return at the second wave (N = 271), and attrition-replacement subjects randomly selected from the same twin registry who

## SEMANTIC FLUENCY PREDICTS MCI 5

completed the test battery for the first time at the second wave ( $N = 179$ ) and were the same age as the wave 2 subjects (56 to 66). For each task, the practice effect calculation estimates a difference score (returnees minus attrition-replacements), and an attrition effect (returnees minus all wave 1 subjects). The practice effect is the difference score minus the attrition effect, and was subtracted from scores for all returnees. Although practice effects were small and often nonsignificant, it is important to correct for small and nonsignificant practice effects as ignoring these small differences result in the underdiagnoses of MCI in this sample<sup>22</sup>.

**Episodic memory.** Episodic memory was measured with the Logical Memory (LM) and Visual Reproductions (VR) subtests of the Wechsler Memory Scale-III<sup>26</sup>, and the California Verbal Learning Test-II (CVLT)<sup>27</sup>. The dependent measures were the LM and VR delayed recall scores, and the CVLT long delay free recall score. These measures were combined to create a latent factor.

**Verbal fluency.** Subjects performed 6 fluency subtests from the Delis-Kaplan Executive Function System (D-KEFS)<sup>28</sup>: phonemic (*F*, *A*, and *S*), followed by semantic subtests (*Animals*, *Boys' Names*, and *Fruits/Furniture*). Dependent measures were the number of words generated in 60 seconds. We utilized a latent variable model of verbal fluency that highlights unique variance in semantic fluency<sup>29</sup>. This model decomposes the variance in the 6 fluency subtests into two latent factors: a general fluency factor captures variance across phonemic and semantic subtests, and a semantic-specific factor captures the remaining variance shared among semantic subtests not captured by the general factor. To be comparable with the other measures, we used the number of words on Fruits/furniture switching condition, ignoring switching ability. This was validated in the previous work<sup>29</sup>, which also showed that removal of this subtest has little impact on the factor structure of verbal fluency. Both factors were explained mostly by genetic

## SEMANTIC FLUENCY PREDICTS MCI 6

influences at mean ages 56 and 62 and demonstrated strong phenotypic and genetic correlations over this six-year interval<sup>29</sup>.

**Mild cognitive impairment.** MCI was diagnosed using the Jak-Bondi actuarial/neuropsychological approach<sup>30-32</sup>. Impairment in a cognitive domain was defined as having at least two tests >1.5 SDs below the age- and education-adjusted normative means after accounting for “premorbid” cognitive ability by adjusting neuropsychological scores for performance on a test of general cognitive ability that was taken at a mean age of 20 years. The adjustment for age 20 cognitive ability ensures that the MCI diagnosis is capturing a decline in function rather than long-standing low ability. The validity of the VETSA MCI diagnoses is supported by previous studies<sup>30-32</sup> and in the present sample by evidence of reduced hippocampal volume in those diagnosed with amnesic MCI<sup>33</sup>. Although biomarker assays are not yet completed, higher AD polygenic risk scores were associated with significantly increased odds of MCI<sup>21</sup>, indicating that our diagnosis is genetically-related to AD.

Because we were interested in transition to MCI, analyses involving MCI at wave 2 only included individuals who were cognitively normal at wave 1 and had data for all covariates. Of the 842 returnees meeting this criterion, 42 (5.0%) progressed to amnesic MCI, and 38 (4.5%) progressed to non-amnesic MCI. An additional 6 individuals who had language impairment (3 of which also had amnesic MCI), were assigned missing values for these analyses to prevent biasing estimates of the association between verbal fluency and MCI; 10 individuals were excluded for missing one or more covariates. However, odds ratios were nearly identical if these individuals were all included (in a model without any covariates).

**Other cognitive measures (wave 1 only).** To examine how other cognitive abilities account for the overlap between episodic memory and semantic fluency, a latent factor for

vocabulary was created using the vocabulary subtest of the Wechsler Abbreviated Scale of Intelligence (WASI)<sup>34</sup> and the multiple-choice vocabulary subtest of the Armed Forces Qualification Test<sup>35,36</sup>. Two executive function latent factors were included based on our previous work<sup>37</sup>. The first factor (Common Executive Function) captures common variance across 6 tasks assessing inhibition, shifting, and working memory<sup>23</sup>. The second latent factor (Working Memory-Specific) captures covariance among working memory tasks not already captured by the common factor.

### Data Analysis

Phenotypic analyses involving MCI were conducted with mixed effects logistic regression using the lme4 package in R version 3.3.1<sup>38</sup>. Pair ID was included as a random effect to account for the clustering of data within families. In these analyses, we also controlled for wave 1 age, diabetes, hypertension, depression symptoms (based on Center for Epidemiologic Studies–Depression scale)<sup>39</sup>, the time interval between wave 1 and wave 2, *ApoE* status ( $\epsilon 4+$  alleles vs.  $\epsilon 4-$ ), and years of education. The lme4 package uses list-wise deletion with missing observations, and reports profile-based 95% confidence intervals (95% CIs).

Additional phenotypic regression and cross-lagged analyses in the full sample were conducted using Mplus Version 7<sup>40</sup>. Genetic analyses were conducted using the structural equation modeling package OpenMx in R<sup>41</sup>. Both programs account for missing observations using a full-information maximum likelihood approach. Model fit for these structural equation models was determined using  $\chi^2$  tests, the Root Mean Square Error of Approximation (RMSEA), and the Comparative Fit Index (CFI). Good fitting models had  $\chi^2$  values less than 2 times the degrees of freedom, RMSEA values  $<.06$ , and CFI values  $>.95$ <sup>42</sup>. Additionally, good fitting genetic models did not fit significantly worse than a full Cholesky decomposition of all

measures, a common baseline model in twin studies. Significance of individual parameters was established with  $\chi^2$  difference tests and standard-error based (Mplus) or likelihood-based (OpenMx) 95% CI.

Genetically-informed models were based on the standard assumptions in twin designs, which decompose variance in phenotype (and covariance among phenotypes) into three sets of influences: additive genetic influences (A), shared environmental influences (C), and nonshared environmental influences (E). Additive genetic influences are correlated at 1.0 in MZ twin pairs and 0.5 in DZ twin pairs because MZ twins share all their alleles identical-by-descent and DZ twins share, on average, 50% of their alleles identical-by-descent. Shared environmental influences (C), which are environmental influences that makes twins in a pair more similar, are correlated at 1.0 in both MZ and DZ twins. Nonshared environmental influences (E), which are environmental influences that make twins in a pair dissimilar, are correlated at 0.0 in both MZ and DZ twin pairs, by definition. We also assume equal means and variances within pairs and across zygosity. These assumptions for univariate analyses apply to multivariate cases and to situations where phenotypic correlations between constructs are decomposed into their genetic ( $r_{\text{genetic}}$ ) and nonshared environmental components ( $r_{\text{environmental}}$ ). Shared environmental influences on verbal fluency factors, and their correlations with episodic memory, were not estimated based on our previous work showing no evidence for shared environment on verbal fluency<sup>29</sup>.

### **Data Availability**

VETSA data are publicly available. Information regarding data access can be found at our website: <https://medschool.ucsd.edu/som/psychiatry/research/VETSA/Pages/default.aspx>

## **Results**

### **Descriptive Statistics**



## SEMANTIC FLUENCY PREDICTS MCI 9

Demographic and clinical characteristics are displayed in Table 1. There were no significant differences between cognitively normal and MCI groups in any of these characteristics, except that individuals who progressed to amnesic MCI were older than those who remained cognitively normal at both wave 1 ( $p=.008$ ) and wave 2 ( $p=.012$ ). Fluency and memory scores are displayed in Table 2.

### **Predicting Progression to MCI**

Table 3 displays the longitudinal logistic regression analyses. Progression to amnesic MCI (Table 3A) or non-amnesic MCI (Table 3B) at wave 2 is predicted by general fluency, semantic-specific and episodic memory factor scores at wave 1 (exported from Mplus), as well as the covariates. Higher odds ratios indicate increased odds of progression to MCI (estimated for -1 *SD* decrease on the original factor score scale).

Results indicated that episodic memory at wave 1 strongly predicted progression to amnesic MCI at wave 2, even when controlling for both verbal fluency factors,  $OR=4.42$ ,  $p<.001$ , 95% CI [2.44, 10.60]. Poor semantic-specific fluency was also associated with nearly double the odds of being diagnosed with amnesic MCI at wave 2 even when controlling for episodic memory,  $OR=1.86$ ,  $p=.025$ , 95% CI [1.12, 3.52]. Poor general fluency was not associated with increased odds of amnesic MCI,  $OR=1.29$ ,  $p=.332$ , 95% CI [0.79, 2.35]. Interestingly, poor episodic memory was also associated with progression to non-amnesic MCI,  $OR=1.92$ ,  $p=.009$ , 95% CI [1.21, 3.34]. Neither fluency factor predicted progression to non-amnesic MCI, both  $ps>.274$ .

### **Longitudinal Associations Between Episodic Memory and Verbal Fluency**

We next fitted a phenotypic cross-lagged model using fluency and memory data from both waves in the full sample. As seen in Figure 1, memory at wave 2 was significantly predicted

## SEMANTIC FLUENCY PREDICTS MCI 10

by semantic-specific fluency at wave 1,  $\beta=.13$ ,  $p=.035$ , 95% CI [.01, .25], even after accounting for memory at wave 1,  $\beta=.85$ ,  $p<.001$ , 95% CI [.74, .98]. In contrast, memory at wave 1 did not predict semantic-specific fluency at wave 2,  $\beta=.04$ ,  $p=.582$ , 95% CI [-.09, .16]. The general fluency factor also did not predict later memory (or vice versa).

### Biometric Models of Cognitive Abilities

In a biometric twin models of wave 1 and 2 data (Figure 3), the phenotypic correlations between memory and semantic-specific fluency were explained primarily by genetic influences,  $r_{\text{genetic}}=.65$ , 95% CI [.46, .88] at wave 1,  $r_{\text{genetic}}=.73$ , 95% CI [.58, .94] and wave 2, explaining 87% (wave 1) and 86% (wave 2) of the total phenotypic correlations. There was also a significant nonshared environmental correlation between episodic memory and semantic-specific fluency at wave 2 only,  $r_{\text{environmental}}=.28$ , 95% CI [.01, .55]. This environmental correlation was nonsignificant at wave 1, but similar in magnitude,  $r_{\text{environmental}}=.25$ , 95% CI [-.08, .60]. Genetic correlations explained 92% (wave 1,  $r_{\text{genetic}}=.50$ , 95% CI [.36, .70]) and 94% (wave 2,  $r_{\text{genetic}}=.36$ , 95% CI [.25, .50]) of the correlation between memory and general fluency.

Using only the wave 1 data, we fit a regression model (Figure 2) in which the 2 fluency factors were regressed on factors for memory, vocabulary, and the 2 executive function factors. Although semantic-specific fluency was positively correlated with episodic memory ( $r=.46$ ,  $p<.001$ ), vocabulary ( $r=.19$ ,  $p<.001$ ), and common executive function ( $r=.20$ ,  $p=.003$ ), only the association with memory remained significant in the regression model,  $\beta=.60$ ,  $p<.001$ . Conversely, the general fluency factor was correlated with all other cognitive abilities ( $r_s=.32$  to  $.50$ ) including memory,  $r=.38$ ,  $p<.001$ , but this association with memory was nonsignificant in the regression model,  $\beta=.04$ ,  $p=.538$ . These findings suggest that the genetic correlations between memory and general fluency were likely explained by their overlap with other cognitive

abilities, but the association episodic memory and semantic-specific fluency reflects unique genetic associations between these constructs.

### Discussion

These findings highlight the importance of episodic memory and semantic fluency as risk factors for cognitive decline and MCI. Among middle-aged men (ages 51-60) who were cognitively normal at baseline, both measures predicted amnesic MCI 6 years later. Importantly, our previous results showing that higher AD polygenic risk scores were associated with significantly increased odds of having MCI in this sample provide support for this diagnosis being AD-related MCI<sup>21</sup>. The current study demonstrated that baseline semantic-specific fluency predicted progression to amnesic MCI even after controlling for baseline memory. In other previous work, we found that there was no change in the semantic-specific factor ( $d=-.01$ ) over this 6-year interval<sup>29</sup>, yet in the current study it did independently predict episodic memory 6 years later. Thus, semantic-specific fluency is associated with episodic memory, but it does not necessarily change at the same time or rate as episodic memory. Nevertheless, it does add to the prediction of memory and progression to amnesic MCI beyond the predictive value of baseline memory itself.

With respect to amnesic MCI, the focus is naturally on episodic memory, but our results indicate that relatively poor semantic-specific fluency performance among cognitively normal adults may precede decline in episodic memory. The associations between semantic-specific fluency and episodic memory were driven by genetic influences at both waves, suggesting that these risk factors are not new to middle age, but may reflect genetic risk factors that impact cognitive performance throughout the lifespan. The associations also had significant non-shared environmental influences at wave 2, suggesting unique environmental risk factors that may

## SEMANTIC FLUENCY PREDICTS MCI 12

present themselves later in life. Although the prediction was not as strong, episodic memory also predicted non-amnestic MCI, suggesting it can also be a predictor of cognitive decline in other domains (except fluency).

Although biomarkers are necessary for biologically-based diagnosis, and are important for identifying individuals at greatest risk for cognitive decline and dementia, several studies have shown that neuropsychological tests are often better and earlier predictors of progression to AD than biomarkers<sup>3-5,43-45</sup>. One reason may be that current techniques for measuring biomarkers are not necessarily able to detect the earliest stages of disease progression. For example, beta-amyloid accumulates slowly for as much as 2 decades before symptom onset, but PET ligands have high affinity only for later stage neuritic beta-amyloid plaques<sup>46,47</sup>. Continuing the search for earlier biomarker detection is critically important. Meanwhile, the present results suggest that measures of memory and fluency are effective early indicators of progression to amnestic MCI given that participants were only in their 50s at the baseline assessment. They can also be completed in a short amount of time at little expense. Fluency and memory measures may be combined with biomarkers to further improve prediction of MCI and AD. Biomarker data will improve determination of specificity for AD-related deficits, and fluency and memory measures may also be useful as screening tools for identifying individuals who should be followed up with biomarker testing.

### **Strengths and Limitations**

This sample comprised primarily white, non-Hispanic men, so these findings may not generalize across sex and race/ethnicity. It will also be important for future work to directly compare these odds ratios with those for biomarkers (preferably in the same model) and to examine whether neuropsychological tests more strongly predict progression to MCI in subsets

of individuals (e.g., who are already amyloid positive). Strengths of the study are that this is a national, rather than a local, community-based non-clinical sample of middle-aged men with health, education, and lifestyle characteristics that are representative of American men in their age range. The young age of the baseline assessment is also a strength with respect to early identification of risk.

## **Conclusions**

This study demonstrated that episodic memory and semantic fluency independently predicted progression to amnesic MCI in cognitively normal, middle-aged men who were only in their 50s at baseline. These findings demonstrate the usefulness of examining neuropsychological variability among cognitively normal individuals for early identification of risk for AD, highlighting the fact that cognitively normal adults should not be treated as a homogeneous group. It will also be important to further examine the cognitive processes that distinguish semantic from phonemic fluency and their underlying neural circuitry, to understand why semantic-specific fluency predicts change in episodic memory (but not vice-versa). This may lead to further insights regarding the mechanisms that drive cognitive decline and the progression to AD. In the meantime, the results suggest that it will be important to take advantage of the predictive ability of episodic memory and verbal fluency tests in studies designed to identify and individuals at greatest risk for MCI (and later dementia). Ultimately, the combination of these cognitive abilities and biomarkers may further improve prediction of MCI and AD.

## References

1. Jack CR, Jr., Bennett DA, Blennow K, et al. NIA-AA Research Framework: Toward a biological definition of Alzheimer's disease. *Alzheimer's & Dementia*. 2018;14(4):535-562.
2. Chen P, Ratcliff G, Belle SH, Cauley JA, DeKosky ST, Ganguli M. Cognitive tests that best discriminate between presymptomatic AD and those who remain nondemented. *Neurology*. 2000;55(12):1847-1853.
3. Gomar JJ, Bobes-Bascaran MT, Conejero-Goldberg C, Davies P, Goldberg TE, Alzheimer's Disease Neuroimaging I. Utility of combinations of biomarkers, cognitive markers, and risk factors to predict conversion from mild cognitive impairment to Alzheimer disease in patients in the Alzheimer's disease neuroimaging initiative. *Arch Gen Psychiat*. 2011;68(9):961-969.
4. Edmonds EC, Delano-Wood L, Galasko DR, Salmon DP, Bondi MW, Alzheimer's Disease Neuroimaging I. Subtle cognitive decline and biomarker staging in preclinical Alzheimer's disease. *Journal of Alzheimer's Disease*. 2015;47(1):231-242.
5. Jedynak BM, Lang A, Liu B, et al. A computational neurodegenerative disease progression score: Method and results with the Alzheimer's Disease Neuroimaging Initiative cohort. *Neuroimage*. 2012;63(3):1478-1486.
6. Murphy KJ, Rich JB, Troyer AK. Verbal fluency patterns in amnesic mild cognitive impairment are characteristic of Alzheimer's type dementia. *Journal of the International Neuropsychological Society*. 2006;12(4):570-574.

## SEMANTIC FLUENCY PREDICTS MCI 15

7. Kochhann R, Pereira AH, Holz MR, Chaves ML, Fonseca RP. Deficits in unconstrained, phonemic and semantic verbal fluency in healthy elders, mild cognitive impairment, and mild Alzheimer's disease patients. *Alzheimer's & Dementia*. 2016;12(7):P751-P752.
8. Nutter-Upham KE, Saykin AJ, Rabin LA, et al. Verbal fluency performance in amnesic MCI and older adults with cognitive complaints. *Archives of Clinical Neuropsychology*. 2008;23(3):229-241.
9. Zhao Q, Guo Q, Hong Z. Clustering and switching during a semantic verbal fluency test contribute to differential diagnosis of cognitive impairment. *Neuroscience Bulletin*. 2013;29(1):75-82.
10. Mueller KD, Kosciak RL, LaRue A, et al. Verbal fluency and early memory decline: Results from the Wisconsin Registry for Alzheimer's Prevention. *Archives of Clinical Neuropsychology*. 2015;30(5):448-457.
11. Raoux N, Amieva H, Le Goff M, et al. Clustering and switching processes in semantic verbal fluency in the course of Alzheimer's disease subjects: Results from the PAQUID longitudinal study. *Cortex*. 2008;44(9):1188-1196.
12. Amieva H, Jacqmin-Gadda H, Orgogozo JM, et al. The 9 year cognitive decline before dementia of the Alzheimer type: A prospective population-based study. *Brain*. 2005;128(5):1093-1101.
13. Henry JD, Crawford JR, Phillips LH. Verbal fluency performance in dementia of the Alzheimer's type: A meta-analysis. *Neuropsychologia*. 2004;42(9):1212-1222.
14. Golde TE, Schneider LS, Koo EH. Anti- $\beta$  therapeutics in Alzheimer's disease: the need for a paradigm shift. *Neuron*. 2011;69(2):203-213.

15. Sperling RA, Aisen PS, Beckett LA, et al. Toward defining the preclinical stages of Alzheimer's disease: recommendations from the National Institute on Aging-Alzheimer's Association workgroups on diagnostic guidelines for Alzheimer's disease. *Alzheimer's & Dementia*. 2011;7(3):280-292.
16. Tsuang MT, Bar JL, Harley RM, Lyons MJ. The Harvard Twin Study of Substance Abuse: What we have learned. *Harvard Review of Psychiatry*. 2001;9(6):267-279.
17. Kremen WS, Panizzon MS, Xian H, et al. Genetic architecture of context processing in late middle age: More than one underlying mechanism. *Psychology and Aging*. 2011;26(4):852-863.
18. Kremen WS, Thompson-Brenner H, Leung YM, et al. Genes, environment, and time: The Vietnam Era Twin Study of Aging (VETSA). *Twin Research and Human Genetics*. 2006;9(6):1009-1022.
19. Schoenborn CA, Heyman KM. Health characteristics of adults aged 55 years and over: United States, 2004-2007. *National Health Statistics Report*. 2009;16(16):1-31.
20. Panizzon MS, Neale MC, Docherty AR, et al. Genetic and environmental architecture of changes in episodic memory from middle to late middle age. *Psychology and Aging*. 2015;30(2):286-300.
21. Logue MW, Panizzon MS, Elman JA, et al. Use of an Alzheimer's disease polygenic risk score to identify mild cognitive impairment in adults in their 50s. *Molecular Psychiatry*. 2018.
22. Elman JA, Jak AJ, Panizzon MS, et al. Underdiagnosis of mild cognitive impairment: A consequence of ignoring practice effects. *Alzheimer's & Dementia: Diagnosis, Assessment & Disease Monitoring*. 2018;10:372-381.



SEMANTIC FLUENCY PREDICTS MCI 17

23. Gustavson DE, Panizzon MS, Franz CE, et al. Genetic and environmental architecture of executive functions in midlife. *Neuropsychology*. 2018;32(1):18-30.
24. Rönnlund M, Nilsson LG. Adult life-span patterns in WAIS-R Block Design performance: Cross-sectional versus longitudinal age gradients and relations to demographic factors. *Intelligence*. 2006;34(1):63-78.
25. Rönnlund M, Nyberg L, Bäckman L, Nilsson LG. Stability, growth, and decline in adult life span development of declarative memory: Cross-sectional and longitudinal data from a population-based study. *Psychology and Aging*. 2005;20(1):3-18.
26. Wechsler D. *Wechsler Memory Scale (WMS-III)*. San Antonio, TX: Psychological Corporation; 1997.
27. Delis DC, Kramer JH, Kaplan E, Ober BA. *California Verbal Learning Test (CVLT-2)*. 2nd ed.. San Antonio, TX: Psychological Corporation; 2000.
28. Delis DC, Kaplan E, Kramer JH. *Delis-Kaplan executive function system (D-KEFS)*. Psychological Corporation; 2001.
29. Gustavson DE, Panizzon MS, Elman JA, et al. Genetic and environmental influences on verbal fluency in middle age: A longitudinal twin study. *Behavior Genetics*. 2018;48(5):361-373.
30. Bondi MW, Edmonds EC, Jak AJ, et al. Neuropsychological criteria for mild cognitive impairment improves diagnostic precision, biomarker associations, and progression rates. *Journal of Alzheimer's Disease*. 2014;42(1):275-289.
31. Jak AJ, Bondi MW, Delano-Wood L, et al. Quantification of five neuropsychological approaches to defining mild cognitive impairment. *The American Journal of Geriatric Psychiatry*. 2009;17(5):368-375.

SEMANTIC FLUENCY PREDICTS MCI 18

32. Kremen WS, Jak AJ, Panizzon MS, et al. Early identification and heritability of mild cognitive impairment. *International Journal of Epidemiology*. 2014;43(2):600-610.
33. Jak AJ, Panizzon MS, Spoon KM, et al. Hippocampal atrophy varies by neuropsychologically defined MCI among men in their 50s. *Am J Geriatr Psychiat*. 2015;23(5):456-465.
34. Wechsler D. *Wechsler abbreviated scale of intelligence*. San Antonio, TX: The Psychological Corporation; 1999.
35. Bayroff AG, Anderson AA. *Development of Literacy Screening Scales for AFQT 7 and 8 Failures*. Washington DC: US Army Reserach Institute;1963.
36. Lyons MJ, Panizzon MS, Liu W, et al. A longitudinal twin study of general cognitive ability over four decades. *DP*. 2017;53(6):1170-1177.
37. Gustavson DE, Panizzon MS, Elman JA, et al. Stability of genetic and environmental influences on executive functions in midlife. *Psychology and Aging*. 2018;33(2):219-231.
38. Bates D, Mächler M, Bolker B, Walker S. Fitting Linear Mixed-Effects Models Using lme4. *Journal of Statistical Software*. 2015;67(1).
39. Radloff LS. The CES-D scale: A self-report depression scale for research in the general population. *Applied Psychological Measurement*. 1977;1(3):385-401.
40. Muthén LK, Muthén BO. *Mplus Version 7 user's guide*. Los Angeles, CA: Muthén & Muthén; 2010-2012.
41. Neale MC, Hunter MD, Pritikin JN, et al. OpenMx 2.0: Extended structural equation and statistical modeling. *Psychometrika*. 2016;81(2):535-549.
42. Hu LT, Bentler PM. Fit indices in covariance structure modeling: Sensitivity to underparameterized model misspecification. *Psychological Methods*. 1998;3(4):424-453.

SEMANTIC FLUENCY PREDICTS MCI 19

43. Ewers M, Walsh C, Trojanowski JQ, et al. Prediction of conversion from mild cognitive impairment to Alzheimer's disease dementia based upon biomarkers and neuropsychological test performance. *Neurobiology of Aging*. 2012;33(7):1203-1214.
44. Gomar JJ, Conejero-Goldberg C, Davies P, Goldberg TE, Alzheimer's Disease Neuroimaging I. Extension and refinement of the predictive value of different classes of markers in ADNI: Four-year follow-up data. *Alzheimer's & Dementia*. 2014;10(6):704-712.
45. Insel PS, Mattsson N, Mackin RS, et al. Accelerating rates of cognitive decline and imaging markers associated with beta-amyloid pathology. *Neurology*. 2016;86(20):1887-1896.
46. Villemagne VL, Burnham S, Bourgeat P, et al. Amyloid beta deposition, neurodegeneration, and cognitive decline in sporadic Alzheimer's disease: a prospective cohort study. *Lancet Neurol*. 2013;12(4):357-367.
47. Jack CR, Jr., Wiste HJ, Lesnick TG, et al. Brain beta-amyloid load approaches a plateau. *Neurology*. 2013;80(10):890-896.

Table 1

*Demographic Characteristics of the Full Sample and Covariates Included in Analyses Involving Mild Cognitive Impairment (MCI)*

| Demographic Variable             | N    | M    | SD   | Range        | <i>p</i> (CN vs. aMCI) | <i>p</i> (CN vs. nMCI) |
|----------------------------------|------|------|------|--------------|------------------------|------------------------|
| <b>All Subjects</b>              |      |      |      |              |                        |                        |
| Lifetime Education               | 1483 | 13.8 | 2.11 | 5, 30        | 0.229                  | 0.168                  |
| Ethnicity (% white non-Hispanic) | 1484 | 88.1 | -    | -            | 0.793                  | 0.743                  |
| ApoE status (% e4 positive)      | 1444 | 29.4 | -    | -            | 0.499                  | 0.093                  |
| <b>Wave 1</b>                    |      |      |      |              |                        |                        |
| Age                              | 1290 | 55.9 | 2.44 | 51.08, 60.67 | 0.136                  | 0.008                  |
| Depression Symptoms              | 1283 | 8.4  | 8.22 | 0, 52        | 0.809                  | 0.818                  |
| Diabetes (% yes)                 | 1237 | 11.2 | -    | -            | 0.747                  | 0.420                  |
| Hypertension (% yes)             | 1237 | 59.8 | -    | -            | 0.259                  | 0.140                  |
| <b>Wave 2</b>                    |      |      |      |              |                        |                        |
| Age                              | 1207 | 61.7 | 2.45 | 56.00, 66.92 | 0.098                  | 0.012                  |
| Age Interval (wave 2 - wave 1)   | 1013 | 5.7  | 0.69 | 4.25, 9.42   | 0.607                  | 0.510                  |

*Note:* The final two columns display the *p* value for comparisons between individuals who were cognitively normal at wave 1 and remained cognitively normal (N=762) and either progressed to amnesic MCI (aMCI; N=42) or nonamnesic MCI (nMCI; N=38) at wave 2. Lifetime education was the number of years of school completed. Depression symptoms were measured with the Center for Epidemiologic Studies – Depression Scale<sup>39</sup>, with scores above 15 indicating risk for clinical depression.

## SEMANTIC FLUENCY PREDICTS MCI 21

Table 2

*Descriptive Statistics for Measures of Verbal Fluency and Episodic Memory in the Full Sample*

| Task               | <i>N</i> | <i>M</i> | <i>SD</i> | Range        | Skewness | Kurtosis |
|--------------------|----------|----------|-----------|--------------|----------|----------|
| Wave 1 (age 56)    |          |          |           |              |          |          |
| Letter F           | 1277     | 12.28    | 4.09      | 1 - 29       | 0.29     | -0.02    |
| Letter A           | 1277     | 11.15    | 3.90      | 1 - 29       | 0.41     | 0.34     |
| Letter S           | 1277     | 13.48    | 4.32      | 1 - 31       | 0.25     | 0.08     |
| Animals            | 1275     | 19.20    | 4.43      | 6 - 39       | 0.26     | 0.26     |
| Boys' Names        | 1276     | 19.09    | 4.48      | 6 - 40       | 0.34     | 0.58     |
| Fruits / Furniture | 1277     | 12.75    | 2.55      | 4 - 22       | -0.01    | 0.30     |
| Wave 2 (Age 62)    |          |          |           |              |          |          |
| Letter F           | 1189     | 11.68    | 4.04      | 0.82 - 28.00 | 0.32     | 0.14     |
| Letter A           | 1189     | 10.39    | 3.87      | 1.44 - 26.00 | 0.31     | -0.06    |
| Letter S           | 1189     | 12.70    | 4.31      | 0.00 - 28.83 | 0.24     | -0.08    |
| Animals            | 1189     | 19.11    | 4.51      | 5.08 - 35.08 | 0.17     | 0.11     |
| Boys' Names        | 1189     | 18.32    | 4.50      | 4.31 - 37.31 | 0.23     | 0.47     |
| Fruits / Furniture | 1188     | 12.30    | 2.58      | 2.71 - 21.71 | 0.02     | 0.38     |

*Note:* In all analyses involving the full sample, these dependent measures were standardized residual scores after removing the effect of age on each measure, but the unadjusted scores are presented here. However, the wave 2 scores reported here reflect the adjustments for practice effects for individuals who participated at both waves of assessment.

Table 3

*Logistic Regression for Mild Cognitive Impairment (MCI) Predicted by Fluency and Memory Factor Scores*

| Dependent Variable             | A) No MCI vs. Amnestic MCI |                      | B) No MCI vs. Non-Amnestic MCI |                     |
|--------------------------------|----------------------------|----------------------|--------------------------------|---------------------|
|                                | OR                         | 95% CI               | OR                             | 95% CI              |
| <i>Cognitive Factor Scores</i> |                            |                      |                                |                     |
| General Fluency                | 1.29                       | [0.79, 2.35]         | 1.29                           | [0.82, 2.12]        |
| Semantic-Specific              | <b>1.86</b>                | <b>[1.12, 3.52]</b>  | 0.92                           | [0.59, 1.42]        |
| Episodic Memory                | <b>4.42</b>                | <b>[2.44, 10.60]</b> | <b>1.92</b>                    | <b>[1.32, 3.34]</b> |
| <i>Covariates</i>              |                            |                      |                                |                     |
| Age (wave 1)                   | 1.28                       | [0.76, 2.32]         | <b>1.77</b>                    | <b>[1.13, 3.05]</b> |
| Age Interval (wave 2 - wave 1) | 1.41                       | [0.87, 2.44]         | 0.99                           | [0.58, 1.57]        |
| Depression (wave 1)            | 0.92                       | [0.56, 1.47]         | 1.01                           | [0.66, 1.52]        |
| ApoE e4+                       | 1.49                       | [0.54, 4.95]         | 0.47                           | [0.13, 1.25]        |
| Diabetes (wave 1)              | 1.05                       | [0.21, 4.47]         | 1.55                           | [0.43, 4.94]        |
| Hypertension (wave 1)          | 1.35                       | [0.52, 4.28]         | 1.69                           | [0.72, 4.48]        |
| Years of Education             | 0.96                       | [0.57, 1.65]         | 0.82                           | [0.49, 1.29]        |

*Note:* Significant odds ratios (ORs) are displayed in bold ( $p < .05$ ). Factor scores for verbal fluency and episodic memory were scored and standardized so the odds ratio indicate the increase in odds of converting to amnestic MCI (A) or non-amnestic MCI (B) at -1 *SD* for that variable. Measures of age, depression, and years of education were also standardized, but not reverse scored. Odds ratios for ApoE status, diabetes, and hypertension reflect increase in odds for having an  $\epsilon 4$  allele, diabetes, or hypertension, respectively. CI = Confidence interval.

Figure Captions:

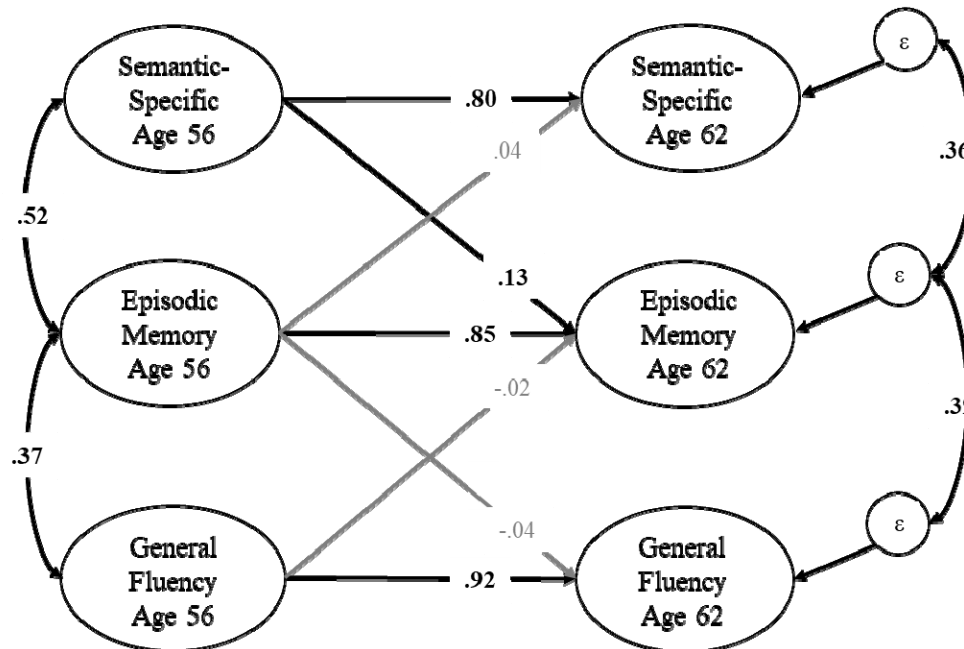

*Figure 1:* Phenotypic cross-lagged model of verbal fluency factors and episodic memory. Both fluency latent factors are correlated with episodic memory at wave 1 (age 56) and predict episodic memory at wave 2 (age 62). Episodic memory at wave 1 also predicts the fluency factors at wave 2. Each factor at wave 1 also predicts itself at wave 2, and there are residual correlations between the residual variances ( $\epsilon$ ) on the fluency factors at wave 2 and the episodic memory factor at wave 2. Not pictured are the factor loadings on individual tasks (which were equated across time and similar in magnitude to those displayed in Figure 3) or residual correlations between all observed variables across time (e.g., *Animals* at wave 1 correlated with *Animals* at wave 2). Significant paths and correlations are displayed in bold, with black text and lines ( $p < .05$ ). The semantic-specific factor is the only factor to significantly predict another construct at the second wave ( $\beta = .13$ ).

## SEMANTIC FLUENCY PREDICTS MCI 24

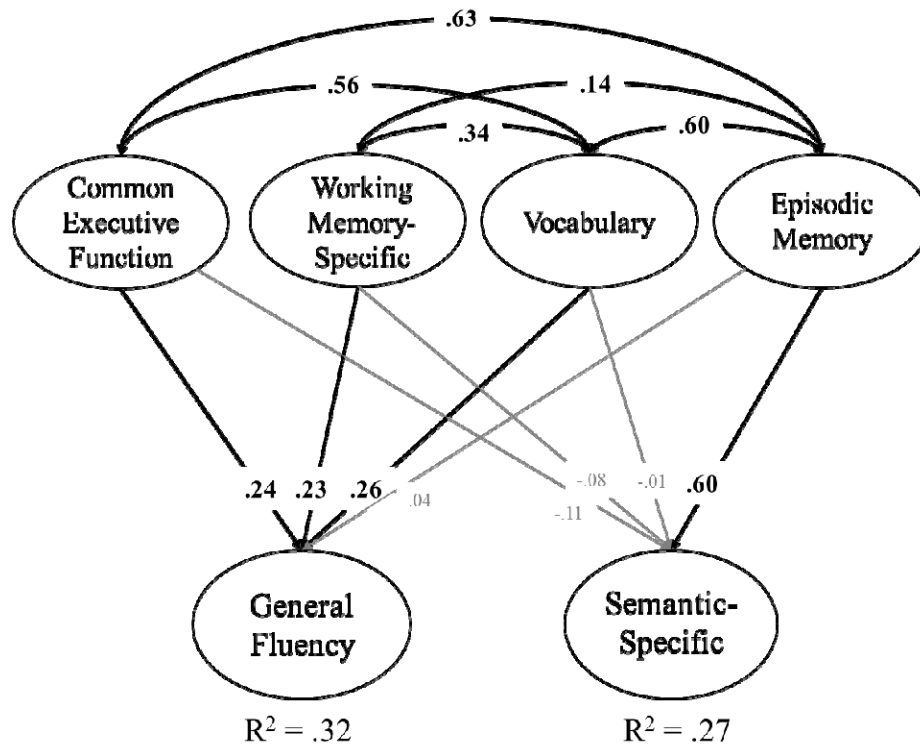

*Figure 2:* Structural equation model where both fluency factors are regressed on latent variables for executive function (Common Executive Function, Working Memory-Specific), vocabulary, and episodic memory. Not pictured are factor loadings on latent factors (which are similar to our previous work and those displayed in Figure 3). Significant paths and correlations are displayed in bold, with black text and lines ( $p < .05$ ).



SEMANTIC FLUENCY PREDICTS MCI 25

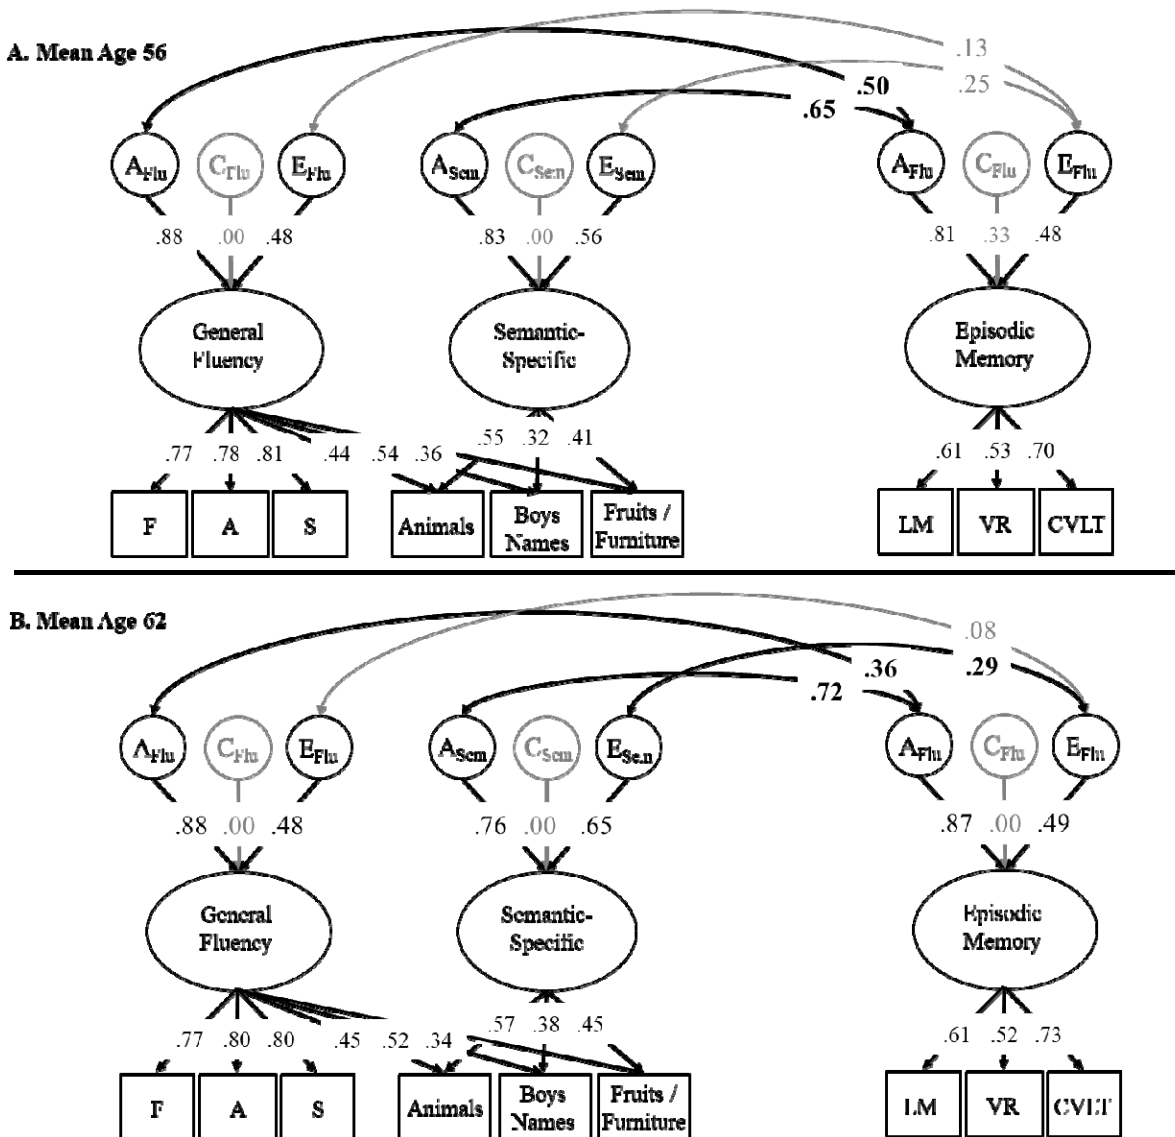

*Figure 3: Full correlational models of the genetic (A), shared environmental (C), and nonshared environmental (E) influences on the general fluency, semantic-specific, and episodic memory latent variables at mean age 56 (top) and mean age 62 (bottom). Ellipses indicate latent variables and rectangles indicate measured variables. Significant factor loadings are displayed in bold, with black text and lines ( $p < .05$ ). Variation explained by latent factors can be computed by squaring the factor loadings.*
